## Effet de la privation de nourriture sur la teneur en ADN de la larve de sole (*Solea solea* L.)

Jean-Pierre Bergeron, Michel Boulhic et Robert Galois

Bergeron, J.-P., Boulhic, M., and Galois, R. 1991. Effet de la privation de nourriture sur la teneur en ADN de la larve de sole (*Solea solea* L.). – ICES J. mar. Sci., 48: 127–134.

La question du rôle de la privation de nourriture dans la mortalité des premiers stades larvaires des poissons marins dans leur milieu naturel a suscité d'importants travaux. Les méthodes proposées font appel à différentes techniques dont aucune n'a jusqu'alors réuni tous les avantages recherchés. Le rapport ARN/ADN, prôné par de nombreux auteurs, semble présenter une variabilité qui nuit à l'efficacité de son application *in situ*. Quelques arguments conceptuels simples conduisent à proposer un nouvel indice biochimique, la teneur de la larve en ADN, exprimée en  $\mu\text{g}/\text{mg}$  de poids sec (ADN/PS). Plusieurs élevages expérimentaux de larves de sole (*Solea solea* L.) ont été entrepris pour tester cette approche: des privations totales ou différées de nourriture leur ont été infligées à deux températures. Il est tout d'abord vérifié que l'évolution du rapport ARN/ADN au cours du développement ontogénique d'individus témoins nourris montre une forte variabilité qui, de plus, n'est pas reproductible, pour un même stade de développement, d'un élevage à l'autre, pourtant menés dans des conditions standard rigoureusement identiques. A l'inverse, ADN/PS s'avère beaucoup plus stable chez les témoins et présente essentiellement deux niveaux, identiques pour les deux températures testées et caractéristiques respectivement de la larve à symétrie bilatérale, puis de l'animal en cours de métamorphose pleuronecte. L'effet de la privation de nourriture est très marqué chez les premiers stades, caractérisé par une élévation rapide, nettement au-delà du seuil significatif que l'on détermine à 30; pour les larves en cours de métamorphose, bien que l'effet soit moins manifeste, le dépassement du seuil de 15 révèle l'inanition. Ces résultats sont discutés en regard des travaux antérieurs, en particulier ceux fondés sur le rapport ARN/ADN. On y trouve des valeurs d'ADN/PS montrant une faible variabilité interspécifique. L'intérêt de la méthode proposée est renforcé par le fait que les techniques fluorimétriques actuelles de mesure permettent de l'appliquer sans difficulté au niveau individuel.

Much work has been devoted to the study of the role played by starvation in the natural field mortality of the early larval stages of marine fishes. Although different methods have been proposed, none have succeeded in including all the various advantages found. The RNA/DNA ratio suggested by many authors seems to show a variability which adversely affects its application *in situ*. Some conceptual considerations have led us to propose a new biochemical index, the DNA amount in the larva (expressed in  $\mu\text{g}/\text{mg}$  dry weight; DNA/DW). Several rearing experiments were carried out with fed and starved Dover sole (*Solea solea* L.) larvae under two temperature conditions. It is confirmed that the RNA/DNA ratio during ontogenetic development of fed individuals exhibits a strong variability which, moreover, is not reproducible for the same development stage between experiments carried out in strictly identical standard conditions. On the other hand, DNA/DW is proving much more stable in fed individuals and shows two main levels which are similar under the two tested temperature conditions and peculiar to symmetrical and metamorphosing larvae respectively. The effect of starvation is very sharp in the early stages, characterized by a rapid increase beyond the significant threshold of 30; for metamorphosing larvae, this effect appears to be less important and the threshold falls to 15. These results are discussed and compared with previous works, especially those based on the RNA/DNA ratio. The literature gives DNA/DW values showing a weak interspecific variability. The interest of the method is reinforced by the fact that recent fluorometric techniques allow DNA determination in individual larvae.

Jean-Pierre Bergeron: IFREMER, Direction des Ressources Vivantes, Laboratoire OCEHAL, BP 1049, 44037 Nantes Cedex 01, France. Michel Boulhic: IFREMER, Direction des Ressources Vivantes, Laboratoire Pêche, BP 70, 29280 Plouzane, France. Robert Galois: CREMA-l'Houmeau, BP5, 17137 – L'Houmeau, France.

### Introduction

La variabilité du recrutement des poissons marins demeure une préoccupation centrale pour la gestion

rationnelle de populations d'espèces exploitées. Parmi les nombreux processus régulateurs invoqués, il apparaît incontestable que l'effectif de chaque classe d'âge est essentiellement déterminé par la forte mortalité que

subissent les animaux au cours de la phase primitive de leur ontogénèse, c'est-à-dire les oeufs, les larves et les juvéniles.

Outre l'influence probable de facteurs abiotiques, privation de nourriture et prédation sont souvent incriminées: la première, initialement suggérée par la formulation du fameux "concept de la période critique" par Hjort en 1914, toujours d'actualité soixante ans plus tard (May, 1974), demeure l'objet de nombreux travaux; la seconde, mise en relief plus récemment (Sissenwine, 1984), pose de tels problèmes méthodologiques pour son étude que Hunter (1984), puis Houde (1987), proposent de contourner le problème en tentant d'appréhender simultanément la mortalité totale et celle due au jeûne afin, par différence, d'en déduire la mortalité imputable à la prédation, à l'instar du travail réalisé par Hewitt *et al.* (1985). Il apparaît ainsi que l'élucidation des parts respectives que prennent ces deux principaux facteurs biotiques dans les fluctuations de mortalité des premiers stades ontogéniques nécessite la définition d'indices de jeûne fiables et performants.

Cet objectif a suscité d'importants efforts menant à la proposition de différentes méthodes de caractérisation de l'effet du jeûne chez les larves de poissons (Clemmesen (1987) et Ueberschär (1988) pour une revue synoptique). Les approches fondées sur des critères biochimiques devraient présenter certains avantages, en particulier 1) la sensibilité, puisque l'on scrute l'effet du jeûne au niveau de la cellule, 2) la reproductibilité, grâce à la définition de conditions d'analyse strictes, et 3) l'objectivité de l'observation par la détermination de seuils quantitatifs. Depuis une dizaine d'années, plusieurs auteurs se sont intéressés à l'utilisation des teneurs en acides nucléiques, prônant notamment le rapport ARN/ADN, sensible au jeûne qu'il révèle par sa diminution rapide (Buckley, 1980). L'applicabilité de cet indice aux larves prélevées *in situ* ne peut cependant être envisagée sans restriction en raison de la variabilité des valeurs qu'il prend en diverses circonstances. D'un examen synthétique des travaux les plus récents il ressort en effet que, chez une même espèce, le rapport ARN/ADN présente de notables fluctuations au cours du développement larvaire (Fukuda *et al.*, 1986; Clemmesen, 1987; Raae *et al.*, 1988), de fortes différences d'un élevage à l'autre (Clemmesen 1987, 1989) ou selon les conditions expérimentales (Raae *et al.*, 1988) susceptibles d'expliquer pour partie les écarts observés entre des larves élevées au laboratoire et celles prélevées dans leur milieu naturel (Buckley (1984) et Buckley et Lough (1987) pour *Gadus morhua* et *Melanogrammus aeglefinus*; Clemmesen (1987, 1989) pour *Clupea harengus*). Ainsi que discrètement suggéré par Clemmesen (1988), c'est à la variabilité des teneurs en ARN que l'on doit probablement imputer celle du rapport ARN/ADN.

La recherche d'un indice d'état de jeûne peut se concevoir selon une démarche différente et plus simple. Considérons l'entité fonctionnelle élémentaire de la larve,

la cellule, et les processus fondamentaux de son métabolisme. C'est à ce niveau que s'effectue l'assimilation de matière et d'énergie apportées par la nutrition. Chaque cellule est constituée de l'assemblage de molécules innombrables, de natures et en quantités variables selon l'organe auquel elle appartient, l'état physiologique de l'animal, etc. et notamment la qualité et la quantité de la nourriture ingérée. En revanche, une seule classe de molécules existe en quantité indépendante de ces conditions et constante dans chaque cellule, il s'agit du stock d'ADN, détenteur du patrimoine génétique de l'animal. On peut alors imaginer aisément que, dès que la cellule est privée de tout apport exogène et avant que le processus de sa désintégration proprement dite ne s'engage, la quasi totalité des autres molécules tende à disparaître progressivement, ce qui devrait se traduire par une augmentation globale de la teneur relative en ADN de la larve.

Des élevages expérimentaux de larves de sole (*Solea solea* L.) ont été entrepris pour tester cette conjecture et comparer les validités respectives du rapport ARN/ADN et du taux d'ADN par unité de poids sec comme indices d'état de jeûne chez cette espèce.

## Matériel et méthodes

### Elevages expérimentaux et échantillonnage

Les expériences ont été menées au Centre de Brest de l'IFREMER, dans les installations du laboratoire Nutrition (Département "Ressources Aquacoles") spécialement affectées à l'élevage de larves de poissons. L'approvisionnement en oeufs de sole fut assuré par les pontes naturelles d'un stock de géniteurs maintenus en captivité dans les conditions décrites par Girin (1978). La technique utilisée pour l'incubation des oeufs a été mise au point par Devauchelle *et al.* (1986). Largement inspirée des méthodes proposées par Girin (1978), la conduite des élevages de larves fut conforme aux conditions générales habituellement respectées par le laboratoire et éprouvées depuis plusieurs années. C'est pour cette raison notamment que la température standard de 19°C fut retenue pour les milieux d'expériences destinées à révéler l'essentiel des phénomènes, une expérience complémentaire étant menée à 12°C afin de vérifier qu'une transposition de ces résultats était envisageable pour une température proche de celle du milieu naturel.

Trois élevages expérimentaux ont été réalisés:

*Expérience 1:* mises à jeun différées à différents stades de développement (19°C). La privation de nourriture est totale, dès l'ouverture de la bouche à J2, ou appliquée à J5 et J10.

*Expérience 2:* jeûne total à basse température (12°C).

*Expérience 3:* détermination du "point de non-retour" (19°C). Les larves sont totalement privées de nourriture dès l'ouverture de la bouche, puis alimentées à

partir des jours 4, 5, 6 ou 7. Tous les résultats de cette expérience ne seront pas présentés ici, seul l'effet de la privation totale de nourriture sera considéré pour tenter de conforter les observations de l'expérience 1. L'ensemble des résultats de cette expérience 3 fera l'objet d'une autre communication (Boulhic *et al.*, en prép.).

Pour chacune de ces expériences, deux lots témoins de larves nourries dans les conditions standard furent constitués. Par ailleurs, chacun des traitements décrits ci-dessus fut appliqué simultanément sur deux lots de larves (réplicats).

La fréquence de l'échantillonnage est généralement de deux jours pour les lots témoins, quotidienne le plus souvent pour les lots mis à jeun, notamment lorsque la dynamique de l'effet sur les larves est *a priori* escompté rapide (privation de nourriture dès l'ouverture de la bouche à 19°C par exemple). Le prélèvement d'échantillons de larves alimentées est systématiquement effectué avant l'administration de nourriture, afin de minimiser l'influence du bol alimentaire sur la composition biochimique de l'animal.

### Mesures de poids sec

Les mesures de poids sec ont été réalisées sur des échantillons également destinés à une analyse des constituants lipidiques (Galois *et al.*, en prép.). L'effectif varie en fonction de la taille des larves, de 80 après l'éclosion à 5 au stade métamorphosé. Les lots de larves sont d'abord décongelés et rincés dans une solution de formate d'ammonium (9 g/l). Ils sont ensuite déposés sur un filtre en fibre de verre Whatman GF/C de 21 mm de diamètre, préalablement calciné à 450°C pendant 2 h, rincé au formate d'ammonium, desséché dans une étuve à 120°C pendant 4 h et pesé sur une microbalance ( $\pm 1 \mu\text{g}$ ) après passage dans un dessiccateur contenant du silicagel activé. L'ensemble échantillon et filtre est lyophilisé, placé sur silicagel dans un dessiccateur pendant 1 h, avant d'être pesé sur la microbalance.

### Dosage des acides nucléiques

Le dosage des acides nucléiques a été effectué sur des échantillons préparés en vue de différentes analyses biochimiques (Boulhic *et al.*, en prép.). 20 larves, de J0 à J7, puis 15 larves jusqu'à la fin de l'expérience ont été broyées à l'aide d'un homogénéiseur Polytron dans un volume variable, selon la taille des larves, de 1 à 2 ml d'eau distillée. Une aliquote de 200  $\mu\text{l}$  de cet homogénat est conservée, congelée à  $-30^\circ\text{C}$ . Après dilution appropriée, cet échantillon est soumis au dosage d'ARN et ADN selon la méthode fluorimétrique initialement proposée par Le Pecq et Paoletti (1966), modifiée par Karsten et

Wollenberger (1972, 1977), avec l'ADN type I de thymus de veau (Sigma) comme standard.

## Résultats

Deux aspects sont fondamentaux pour la définition d'un indice de jeûne applicable à des larves prélevées dans leur milieu naturel: il ne suffit pas que la privation de nourriture induise des modifications quantitatives notables de l'indice; encore faut-il que ces écarts puissent être appréciés sur des individus dont on ne connaît rien de l'histoire, ce qui implique que les individus alimentés "normalement" présentent des valeurs relativement stables et aussi peu dépendantes que possible des stades de développement ontogénique.

### Evolution ontogénique des teneurs en acides nucléiques chez les larves témoins nourries

Dans les conditions standard d'élevage à 19°C, l'évolution de la teneur en ADN (Fig. 1), exprimée en  $\mu\text{g}/\text{mg}$  de poids sec (ADN/PS), apparaît discontinue, prenant approximativement l'aspect de deux plateaux successifs: hormis une phase initiale, les deux premiers jours, montrant une certaine variabilité, les valeurs mesurées sont d'environ 24–25 jusqu'au septième jour après l'éclosion de la larve (J7), puis globalement comprises entre 10 et 14 à partir de J9. Ces deux niveaux moyens sont nettement séparés par une diminution abrupte d'environ 40%. Pour une vitesse de croissance moins élevée, à 12°C, les résultats permettent de confirmer cette chute qui prend alors l'aspect d'une courte phase transitoire et correspond exactement, pour les deux températures, au même stade 3 de développement de la larve de sole, d'après une description de l'évolution des principaux caractères morphologiques et anatomiques établie par F. Lagardère (com. pers.) et inspirée de Ryland (1966). Il s'agit du stade ultime de développement de la larve à symétrie bilatérale par rapport au plan sagittal qui apparaît entre J7 et J8 à 19°C, entre J16 et J20 à 12°C. Les valeurs d'ADN/PS constituant le premier plateau sont donc obtenues pour les larves symétriques, le second plateau traduit les remaniements anatomiques qui, dès la manifestation des premiers signes d'asymétrie, s'effectuent progressivement jusqu'à l'accomplissement de la métamorphose pleuronecte (J15–16 à 19°C, peu après J30 à 12°C). Il est remarquable de constater la similitude des deux courbes d'évolution des valeurs d'ADN/PS obtenues pour deux durées, variant du simple au double, de développement ontogénique de la larve.

Les valeurs du rapport ARN/ADN présentent d'emblée un aspect différent, notamment par une dispersion incomparablement plus grande (Fig. 2). On peut souligner une bonne concordance générale des répliquats, ce qui suggère une certaine cohérence et fiabilité des résultats. Il n'est

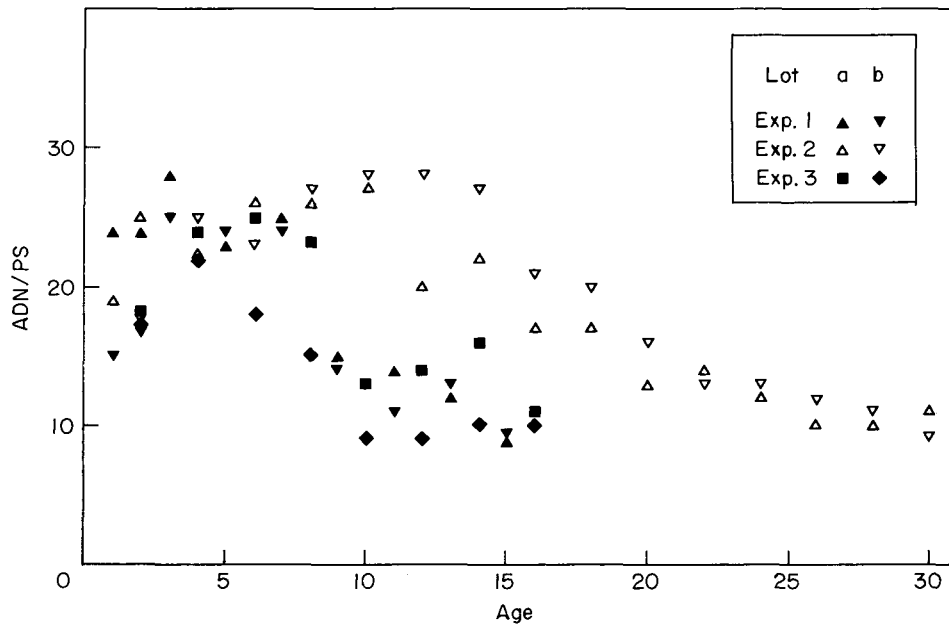

Figure 1. Evolution de la teneur en ADN (exprimée en  $\mu\text{g}/\text{mg}$  de poids sec) au cours du développement ontogénique (âge exprimé en nombre de jours après l'éclosion) de larves de sole nourries dans des conditions standard à 12 et 19°C.

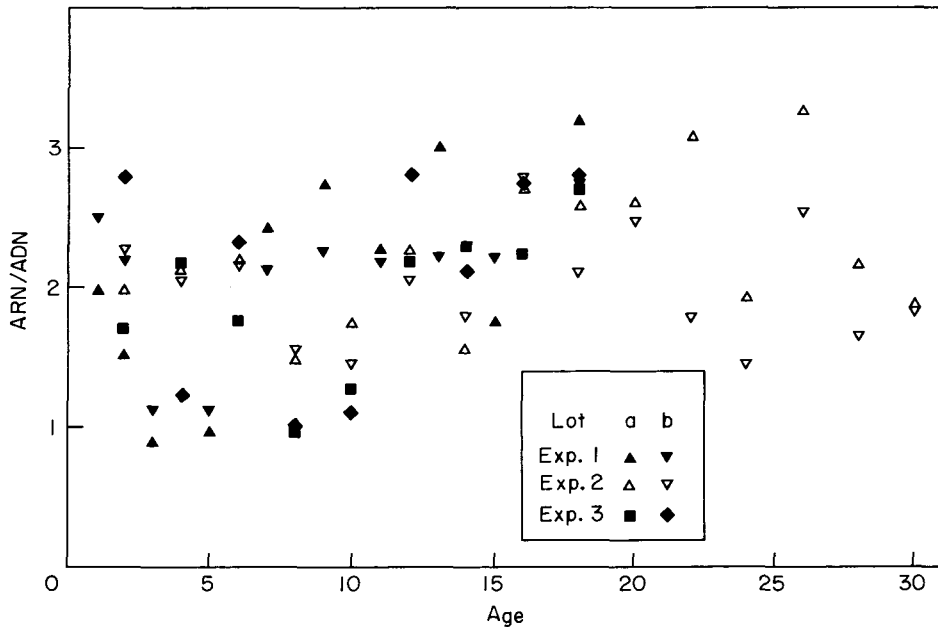

Figure 2. Evolution du rapport ARN/ADN au cours du développement ontogénique (âge exprimé en nombre de jours après l'éclosion) de larves de sole nourries dans des conditions standard à 12 et 19°C.

cependant pas possible de dégager une quelconque tendance générale, ni la moindre reproductibilité, dans l'évolution du rapport au cours du développement larvaire, surtout si l'on considère les deux expériences 1 et 3 soumises aux mêmes conditions standard d'élevage.

#### Effet du jeûne sur la teneur en ADN des larves

Chez les larves privées de nourriture dès l'ouverture de la bouche (J2 à 19°C, J4 à 12°C), l'effet est quasi immédiat à 19°C (Fig. 3), dès J3, et, de manière prévisible lorsque la

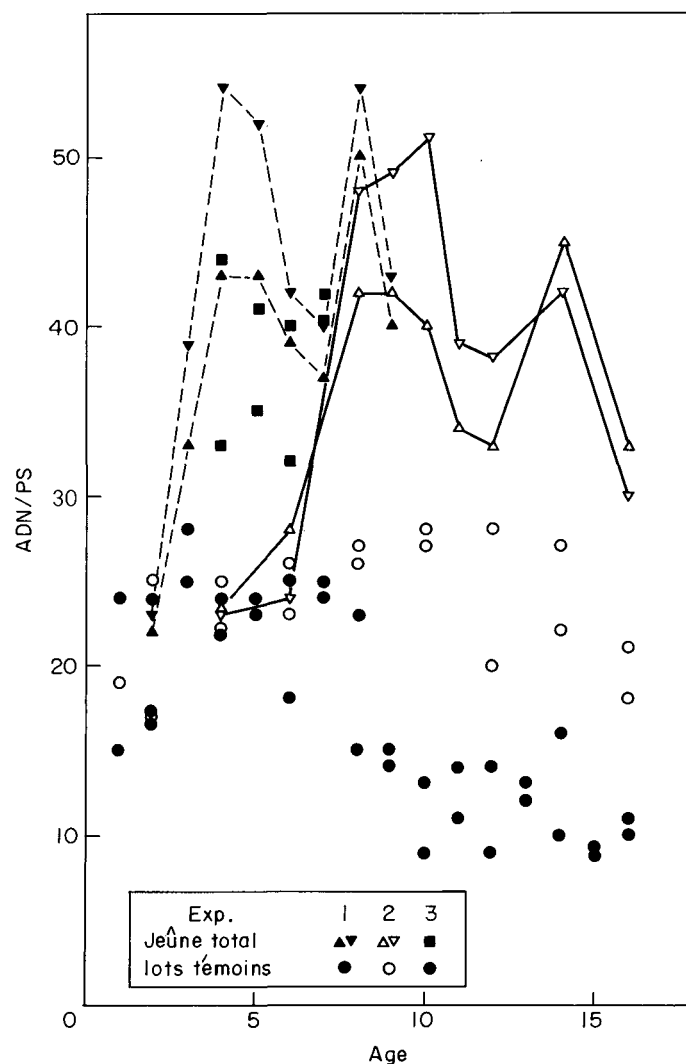

Figure 3. Effet de la privation totale de nourriture sur la teneur en ADN (exprimée en  $\mu\text{g}/\text{mg}$  de poids sec) des larves de sole élevées à 12 et 19°C.

croissance est moins rapide, quelque peu différée à 12°C, probablement dès J7 (mais non mesuré), certainement à J8. L'évolution ultérieure présente globalement le même aspect pour les deux températures: ADN/PS atteint vite des valeurs maximales en deux à trois jours, supérieures à 40, voire 50, puis décroît un peu, augmente à nouveau et diminue enfin chez les derniers survivants. Au cours de l'expérience 3 (menée à 19°C), des échantillons furent prélevés le jour même de la première administration de nourriture, juste avant celle-ci. On dispose ainsi de huit mesures complémentaires (Fig. 3), effectuées sur des lots différents de larves soumises au jeûne total et qui confirment la nette élévation de la teneur en ADN.

L'expérience 1 avait également pour objectif de rechercher l'effet de mises à jeun différées. Chez les larves

privées de nourriture à J5, ADN/PS évolue de façon comparable à celle décrite ci-dessus pour le jeûne total, mais avec des valeurs maximales moins élevées (Fig. 4). Pour les larves privées de nourriture à J10, une notable disparité se manifeste entre les deux lots: l'un d'eux présente une agumentation significative, de l'ordre de 50%, dès J12; pour le second, même si ADN/PS prend des valeurs légèrement supérieures à celles mesurées chez les individus témoins, l'effet du jeûne est très fugace et apparemment insignifiant.

Il apparaît ainsi incontestable que le franchissement de seuil de 30, jamais atteint par les individus témoins nourris, révèle l'inanition chez la larve de sole aux premiers stades caractérisés par la symétrie bilatérale. Pour les stades larvaires ultérieurs, ce seuil s'abaisse à 15.

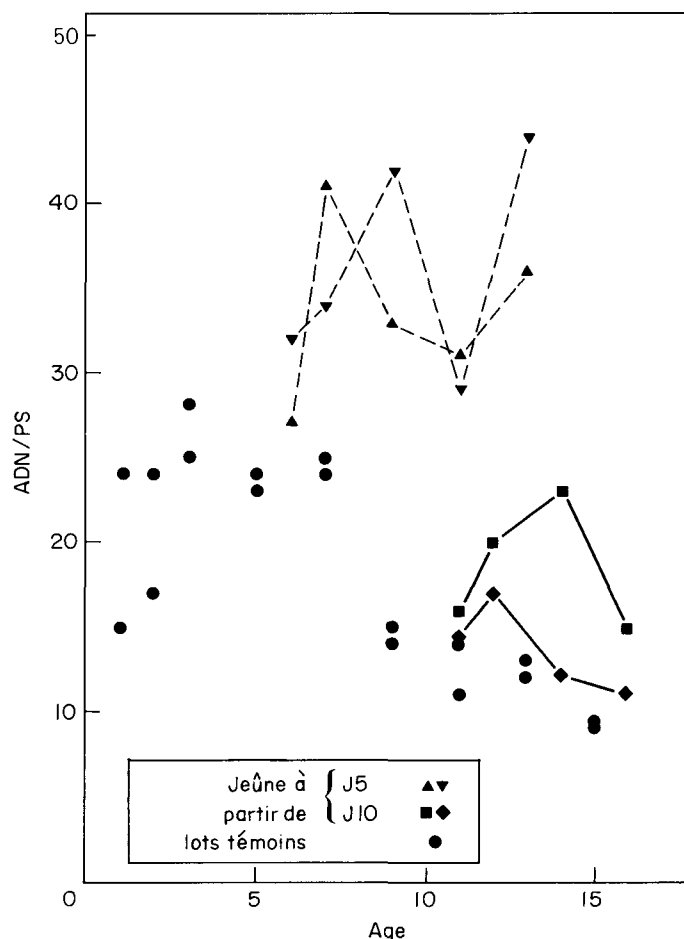

Figure 4. Effet de la privation de nourriture imposée à partir de J5 et J10 sur la teneur en ADN (exprimée en  $\mu\text{g}/\text{mg}$  de poids sec) des larves de sole élevées à  $19^\circ\text{C}$ .

## Discussion

L'utilisation de la teneur en acides nucléiques d'organismes n'est pas un concept d'introduction récente en biologie marine: le premier, Sutcliffe (1965) proposa d'estimer la croissance par des mesures d'ARN, mais la validité de l'approche fut ensuite contestée, notamment par Dagg et Littlepage (1972), puis par Ota et Landry (1984). C'est à Bulow (1970) que revient l'initiative d'avoir suggéré l'emploi du rapport ARN/ADN comme indice de croissance de poissons; il est à noter que, dans son travail, les variations de croissance étaient provoquées par l'administration de rations alimentaires quantitativement différentes, y compris des privations totales de nourriture, ce qui allait probablement inciter le développement ultérieur de travaux portant sur l'application de ce rapport ARN/ADN non plus seulement à l'évaluation de la croissance, mais aussi à la détection de l'effet du jeûne sur les organismes. Buckley (1979) fut le promoteur de ces nombreux travaux spécifiquement consacrés aux larves de

poissons marins dans l'optique de la détermination d'une cause de leur mortalité dans le milieu naturel, conformément à l'hypothèse de Hjort (1914). Il semble qu'il y ait eu, dès lors, une sorte de dérive du concept de base guidant la recherche d'un indice de jeûne: les ARN sont en réalité bien peu spécifiques de ce que l'on peut théoriquement attendre d'un effet de la privation de nourriture sur le métabolisme, hormis par le biais d'une répercussion inévitable sur la croissance pour laquelle, en revanche, la proposition initiale de tenter son évaluation par la mesure des ARN reposait sur des fondements conceptuels plus solides (Bulow, 1970; Buckley, 1984). Mais l'écueil consiste en la haute variabilité des teneurs en ARN, ainsi que nous le soupçonnions au départ et qu'il est largement confirmé par les résultats présentés ici. Cette variabilité se manifeste non seulement au cours du développement ontogénique, mais aussi, dans des conditions standard d'élevage rigoureusement identiques, à chacun des stades de ce développement. Ceci conduit à modérer sensiblement l'efficacité et la fiabilité du rapport ARN/ADN pour

détecter précocement l'inanition chez des larves de sole, et à plus forte raison chez des individus prélevés dans leur milieu naturel.

La détermination de la concentration individuelle en ADN donne des résultats beaucoup plus prometteurs pour l'espèce étudiée ici. Certes, la réponse apparaît moins catégorique pour les stades plus évolués en cours de métamorphose (privation de nourriture à J 10), l'un des deux lots expérimentaux peut même être considéré comme insignifiant de ce point de vue, bien que, dans ce cas, on ne puisse exclure que les conditions d'élevage n'aient pas été suffisamment rigoureuses pour garantir une privation totale de nourriture. L'amoinissement de l'effet du jeûne à ce stade du développement ontogénique se conçoit aisément du fait de la conjonction de deux facteurs, la robustesse des animaux acquise après plusieurs jours d'alimentation abondante et le ralentissement du métabolisme cellulaire; des observations analogues ont été faites avec le rapport ARN/ADN (Clemmesen, 1987). Quoi qu'il en soit, il est essentiel que la méthode soit performante pour les premiers stades de la phase larvaire, notamment le stade de la résorption complète du vitellus, classiquement considéré comme le plus critique parce qu'à ce moment particulier l'individu ne dispose plus de réserves endogènes et dès lors sa subsistance ne peut être assurée que par son environnement trophique. Le travail de Hewitt *et al.* (1985), par exemple, semble bien confirmer la vulnérabilité particulière de ces premiers stades. Et c'est précisément pour ceux-ci que les résultats expérimentaux obtenus pour la sole apparaissent spécialement démonstratifs. Des données de la littérature pourraient cependant laisser supposer que tel n'est pas toujours le cas: on y trouve notamment des valeurs d'ADN/PS pour *Gadus morhua* (Buckley, 1979), *Clupea harengus* et *Scophthalmus maximus* (Clemmesen, 1987) qui, bien qu'augmentant chez les individus à jeun, ne semblent pas montrer, par rapport aux témoins nourris, des écarts aussi significatifs que dans la présente étude. Encore cette remarque mérite-t-elle d'être nuancée, car le métabolisme des larves de morue, élevées à 7°C, est probablement moins rapide que celui de nos soles et les privations de nourriture sont imposées, en particulier aux larves de turbot, à des stades plus avancés où, comme cela vient d'être évoqué ci-dessus, l'effet est logiquement moins perceptible.

Par ailleurs, les données de Buckley (1979) et de Clemmesen (1987) contiennent un élément important confirmant l'intérêt de la teneur en ADN pour détecter l'inanition, il s'agit de sa faible variabilité interspécifique, qui permet d'envisager de l'appliquer avec succès à des larves de différentes espèces de poissons prélevées dans leur milieu naturel. A cela s'ajoutent la faible variabilité au cours du développement ontogénique dans des conditions d'alimentation normales et, venant en corollaire, la détermination de seuils quantitatifs significatifs d'un état de jeûne et indépendants des stades de développement, tout au moins lorsque la larve est symétrique. La

méthode proposée offre en outre l'intérêt de pouvoir être mise en oeuvre au niveau individuel: les techniques fluorimétriques de dosage de l'ADN sont extrêmement sensibles, qu'elles reposent sur l'utilisation comme ici du bromure d'éthidium (Karsten et Wollenberger, 1972, 1977) ou du bisbenzimidazole, ou Hoechst 33258 (Brunk *et al.*, 1979; Cesarone *et al.*, 1979), et sans qu'il soit nécessaire *a priori* de recourir, ainsi que l'a suggéré Clemmesen (1988), à différentes étapes de purification, immanquablement nuisibles à la précision de la mesure.

La dernière question qu'il convient de se poser est relative à la spécificité de l'indice biochimique proposé. Du point de vue conceptuel, il s'agit, par essence, d'un "indice d'amaigrissement" de la larve. Que cet amaigrissement ait pour origine un manque réel de nourriture ou qu'il relève d'une autre cause pathologique, il apparaît assuré qu'une jeune larve de sole, prélevée dans son milieu naturel, présentant une teneur en ADN supérieure à 30 a des chances de survie bien ténues.

## Remerciements

Ce travail a bénéficié d'appuis méritant toute notre gratitude: la grande expérience en la matière de J. Person-Le Ruyet et les soins attentifs prodigués par J. C. Alexandre aux élevages des larves ont permis de conduire ceux-ci dans les meilleures conditions; la minutie de F. Gillette a assuré les dosages d'acides nucléiques d'une qualité irréprochable.

- Brunk, C. F., Jones, K. C., et James, T. W. 1979. Assay for nanogram quantities of DNA in cellular homogenates. *Anal. Biochem.*, 92: 497-500.
- Buckley, L. J. 1979. Relationships between RNA-DNA ratio, prey density, and growth rate in Atlantic cod (*Gadus morhua*) larvae. *J. Fish. Res. Board Can.*, 36: 1497-1502.
- Buckley, L. J. 1980. Changes in ribonucleic acid, deoxyribonucleic acid, and protein content during ontogenesis in winter flounder, *Pseudopleuronectes americanus*, and effect of starvation. *Fish. Bull.*, U.S., 77: 703-708.
- Buckley, L. J. 1984. RNA-DNA ratio: an index of larval fish growth in the sea. *Mar. Biol.*, 80: 291-298.
- Buckley, L.J., et Lough, R.G. 1987. Recent growth, biochemical composition, and prey field of larval haddock (*Melanogrammus aeglefinus*) and Atlantic cod (*Gadus morhua*) on Georges Bank. *Can. J. Fish. aquat. Sci.*, 44: 14-25.
- Bulow, F. J. 1970. RNA-DNA ratios as indicators of recent growth rates of a fish. *J. Fish. Res. Board Can.*, 27: 2343-2349.
- Cesarone, C. F., Bolognesi, C., et Santi, L. 1979. Improved microfluorometric DNA determination in biological material using 33258 Hoechst. *Anal. Biochem.*, 100: 188-197.
- Clemmesen, C. M. 1987. Laboratory studies on RNA/DNA ratios of starved and fed herring (*Clupea harengus*) and turbot (*Scophthalmus maximus*) larvae. *J. Cons. int. Explor. Mer.*, 43: 122-128.
- Clemmesen, C. M. 1988. A RNA and DNA fluorescence technique to evaluate the nutritional condition of individual marine fish larvae. *Meeresforsch.*, 32: 134-143.
- Clemesen, C. M. 1989. RNA/DNA ratios of laboratory-reared and wild herring larvae determined with a highly sensitive fluorescence method. *J. Fish Biol.*, 35 (suppl. A): 331-333.

- Dagg, M. J., et Littlepage, J. L. 1972. Relationships between growth rate and RNA, DNA protein and dry weight in *Artemia Salina* and *Euchaeta elongata*. *Mar. Biol.*, 17: 162–170.
- Devauchelle, N., Letty, Y., et Quere, M. 1986. Experimental units for incubation and larval rearing with special reference to four marine fish species. *Aquaculture*, 58: 297–304.
- Fukuda, M., Nakano, H., et Yamamoto, K. 1986. Biochemical changes in Pacific herring during early developmental stages. *Bull. Fac. Fish. Hokkaido Univ.*, 37: 30–37.
- Girin, M. 1978. Méthodes de production des juvéniles chez trois poissons marins: le bar (*Dicentrarchus labrax*), la sole (*Solea solea*) et le turbot (*Scophthalmus maximus*). Thèse Doc. d'Etat, Univ. P. et M. Curie, Paris. 202 pp.
- Hewitt, R. P., Theilacker, G. H., et Lo, N. C. H. 1985. Causes of mortality in young jack mackerel. *Mar. Ecol. Prog. Ser.* 26: 1–10.
- Hjort, J. 1914. Fluctuations in the great fisheries of northern Europe viewed in the light of biological research. *Rapp. P.-v. Réun. Cons. int. Explor. Mer*, 20: 1–228.
- Houde, E. D. 1987. Fish early life dynamics and recruitment variability. *Am. Fish. Soc. Symp.*, 2: 17–29.
- Hunter, J. R. 1984. Inferences regarding predation on the early life stages of cod and other fishes. *In* The propagation of cod *Gadus morhua* L., pp. 533–562. Ed. par E. Dahl, D. S. Danielssen, E. Moksness et P. Solemdal. Flodevigen rapportser., 1, Arendal, Norway. 895 pp.
- Karsten, U., et Wollenberger, A. 1972. Determination of DNA and RNA in homogenized cells and tissues by surface fluorometry. *Anal. Biochem.*, 46: 135–148.
- Karsten, U., et Wollenberger, A. 1977. Improvements in the ethidium bromide method for direct fluorometric estimation of DNA and RNA in cell and tissue homogenates. *Anal. Biochem.* 77: 464–470.
- Le Pecq, J. B., et Paoletti, C. 1966. A new fluorometric method for RNA and DNA determination. *Anal. Biochem.*, 17: 100–107.
- May, R. C. 1974. Larval mortality in marine fishes and the critical period concept. *In* The early life history of fish, pp. 3–19. Ed. par J. H. S. Blaxter. Springer-Verlag, Berlin. 765 pp.
- Ota, A. Y., et Landry, M. R. 1984. Nucleic acids as growth rate indicators for early developmental stages of *Canalus pacificus* Brodsky. *J. Exp. Mar. Biol. Ecol.*, 80: 147–160.
- Raae, A. J., Opstad, I., Kvenseth, P., et Walther, B. T. 1988. RNA, DNA and protein during early development in feeding and starved cod (*Gadus morhua* L.) larvae. *Aquaculture*, 73: 247–259.
- Ryland, J. S. 1966. Observations on the development of larvae of the plaice, *Pleuronectes platessa* L., in aquaria. *J. Cons. int. Explor. Mer*, 30: 177–195.
- Sissenwine, M. P. 1984. Why do fish populations vary? *In* Exploitation of marine communities, pp. 59–94. Ed. par R. M. May. Dahlem Konferenzen, Springer-Verlag, Berlin. 367 pp.
- Sutcliffe, W. H., Jr. 1965. Growth estimates from ribonucleic acid content in some small organisms. *Limnol. Oceanogr.*, 10 (suppl.): R253–R258.
- Ueberschär, B. F. R. 1988. Determination of the nutritional condition of individual marine fish larvae by analyzing their proteolytic enzyme activities with a highly sensitive fluorescence technique. *Meeresforsch.*, 32: 144–154.
